# Supplementary material
Source: ML conference proceedings conference paper supplement (https://proceedings.neurips.cc/paper_files/paper/2012/hash/2b24d495052a8ce66358eb576b8912c8-Abstract.html)
Supplement: Supplementary file [file 2b24d495052a8ce66358eb576b8912c8-Supplemental.zip]

## Supplementary Material

**Proposition 1.** The data function sum  $E_\sigma \left( \prod_{k=1}^r h(x_{\sigma \cdot i_1^k}, \dots, x_{\sigma \cdot i_d^k}) \right)$  is invariant within each index orbit of group action  $G := S_n \times S_r \times S_d^r$  acting on the index set  $U_d^r$  as defined in definition 1, and  $E_\sigma \left( \prod_{k=1}^r h(x_{\sigma \cdot i_1^k}, \dots, x_{\sigma \cdot i_d^k}) \right) =$

$$\frac{\sum_{\{(j_1^1, \dots, j_d^1), \dots, (j_1^r, \dots, j_d^r)\} \in [\{(i_1^1, \dots, i_d^1), \dots, (i_1^r, \dots, i_d^r)\}]} \prod_{k=1}^r h(x_{j_1^k}, \dots, x_{j_d^k})}{\text{card}([\{(i_1^1, \dots, i_d^1), \dots, (i_1^r, \dots, i_d^r)\}])} \quad (1)$$

where  $\text{card}([\{(i_1^1, \dots, i_d^1), \dots, (i_1^r, \dots, i_d^r)\}])$  is the cardinality of the index orbit, i.e., the number of indices within the index orbit  $[\{(i_1^1, \dots, i_d^1), \dots, (i_1^r, \dots, i_d^r)\}]$ .

**Proof:** first, it is obvious that  $G := S_n \times S_r \times S_d^r$  is a group with identity  $e_G = (e_n, e_r, e_d, \dots, e_d)$ , where  $e_n$ ,  $e_r$ , and  $e_d$  are identity mappings of  $S_n$ ,  $S_r$ , and  $S_d$  respectively. Then it is easy to verify that  $e_G \cdot \{(i_1^1, \dots, i_d^1), \dots, (i_1^r, \dots, i_d^r)\} \mapsto \{(i_1^1, \dots, i_d^1), \dots, (i_1^r, \dots, i_d^r)\}$ .

In addition, let  $g1 = (\sigma1, \tau1, \pi1_1, \dots, \pi1_r)$  and  $g2 = (\sigma2, \tau2, \pi2_1, \dots, \pi2_r) \in G$ , then

$$\begin{aligned} & g1 \cdot (g2 \cdot (\{(i_1^1, \dots, i_d^1), \dots, (i_1^r, \dots, i_d^r)\})) \\ &= \{(\sigma1\sigma2(i_{\pi2_1^{-1}\pi1_1^{-1}(1)}^{\tau2^{-1}\tau1^{-1}(1)})) \dots \sigma1\sigma2(i_{\pi2_r^{-1}\pi1_r^{-1}(d)}^{\tau2^{-1}\tau1^{-1}(d)})), \dots, (\sigma1\sigma2(i_{\pi2_r^{-1}\pi1_r^{-1}(1)}^{\tau2^{-1}\tau1^{-1}(r)}) \dots \sigma1\sigma2(i_{\pi2_r^{-1}\pi1_r^{-1}(d)}^{\tau2^{-1}\tau1^{-1}(r)}))\} \\ &= \{(\sigma1\sigma2(i_{(\pi1_1\pi2_1)^{-1}(1)}^{(\tau1\tau2)^{-1}(1)})) \dots \sigma1\sigma2(i_{(\pi1_1\pi2_1)^{-1}(d)}^{(\tau1\tau2)^{-1}(d)})), \dots, (\sigma1\sigma2(i_{(\pi1_r\pi2_r)^{-1}(1)}^{(\tau1\tau2)^{-1}(r)}) \dots \sigma1\sigma2(i_{(\pi1_r\pi2_r)^{-1}(d)}^{(\tau1\tau2)^{-1}(r)}))\} \\ &= (g1g2) \cdot (\{(i_1^1, \dots, i_d^1), \dots, (i_1^r, \dots, i_d^r)\}). \end{aligned}$$

Therefore, the action defined in definition 1 is a group action acting on the set of  $U_d^r$ . It is well known that a group action partitions the set into disjoint orbits. By the definition of orbit, for any index paragraph

$$\{(j_1^1, \dots, j_d^1), \dots, (j_1^r, \dots, j_d^r)\} \in [\{(i_1^1, \dots, i_d^1), \dots, (i_1^r, \dots, i_d^r)\}],$$

there exists a  $(\tilde{\sigma}, \tau, \pi_1, \dots, \pi_r) \in G$  such that

$$\{(j_1^1, \dots, j_d^1), \dots, (j_1^r, \dots, j_d^r)\} = (\tilde{\sigma}, \tau, \pi_1, \dots, \pi_r) \cdot \{(i_1^1, \dots, i_d^1), \dots, (i_1^r, \dots, i_d^r)\}.$$

Since the data function  $h$  is symmetric and multiplication is commutative,

$$\begin{aligned} E_\sigma \left( \prod_{k=1}^r h(x_{\sigma(j_1^k)}, \dots, x_{\sigma(j_d^k)}) \right) &= \frac{1}{|S_n|} \sum_{\sigma \in S_n} \left( \prod_{k=1}^r h(x_{\sigma\tilde{\sigma}(i_1^k)}, \dots, x_{\sigma\tilde{\sigma}(i_d^k)}) \right) = \\ &= E_{\sigma\tilde{\sigma}} \left( \prod_{k=1}^r h(x_{\sigma\tilde{\sigma}(i_1^k)}, \dots, x_{\sigma\tilde{\sigma}(i_d^k)}) \right) = E_\sigma \left( \prod_{k=1}^r h(x_{\sigma \cdot i_1^k}, \dots, x_{\sigma \cdot i_d^k}) \right). \end{aligned}$$

So  $E_\sigma(\prod_{k=1}^r h(x_{\sigma \cdot i_1^k}, \dots, x_{\sigma \cdot i_d^k}))$  is invariant within each index orbit. In addition, since a permutation moves any orbit to itself, we get

$$\begin{aligned} & \sum_{\{(j_1^1, \dots, j_d^1), \dots, (j_1^r, \dots, j_d^r)\} \in [\{(i_1^1, \dots, i_d^1), \dots, (i_1^r, \dots, i_d^r)\}]} \left( \prod_{k=1}^r h(x_{\sigma(j_1^k)}, \dots, x_{\sigma(j_d^k)}) \right) \\ &= \sum_{\{(j_1^1, \dots, j_d^1), \dots, (j_1^r, \dots, j_d^r)\} \in [\{(i_1^1, \dots, i_d^1), \dots, (i_1^r, \dots, i_d^r)\}]} \left( \prod_{k=1}^r h(x_{j_1^k}, \dots, x_{j_d^k}) \right), \text{ thus} \end{aligned}$$

$$\begin{aligned}
& \text{card}(\{(i_1^1, \dots, i_d^1), \dots, (i_1^r, \dots, i_d^r)\}) E_\sigma \left( \prod_{k=1}^r h(x_{\sigma \cdot i_1^k}, \dots, x_{\sigma \cdot i_d^k}) \right) \\
&= \sum_{\{(j_1^1, \dots, j_d^1), \dots, (j_1^r, \dots, j_d^r)\} \in [\{(i_1^1, \dots, i_d^1), \dots, (i_1^r, \dots, i_d^r)\}]} E_\sigma \left( \prod_{k=1}^r h(x_{\sigma(j_1^k)}, \dots, x_{\sigma(j_d^k)}) \right) \\
&= E_\sigma \left( \sum_{\{(j_1^1, \dots, j_d^1), \dots, (j_1^r, \dots, j_d^r)\} \in [\{(i_1^1, \dots, i_d^1), \dots, (i_1^r, \dots, i_d^r)\}]} \left( \prod_{k=1}^r h(x_{\sigma(j_1^k)}, \dots, x_{\sigma(j_d^k)}) \right) \right) \\
&= E_\sigma \left( \sum_{\{(j_1^1, \dots, j_d^1), \dots, (j_1^r, \dots, j_d^r)\} \in [\{(i_1^1, \dots, i_d^1), \dots, (i_1^r, \dots, i_d^r)\}]} \left( \prod_{k=1}^r h(x_{j_1^k}, \dots, x_{j_d^k}) \right) \right) \\
&= \sum_{\{(j_1^1, \dots, j_d^1), \dots, (j_1^r, \dots, j_d^r)\} \in [\{(i_1^1, \dots, i_d^1), \dots, (i_1^r, \dots, i_d^r)\}]} \left( \prod_{k=1}^r h(x_{j_1^k}, \dots, x_{j_d^k}) \right)
\end{aligned}$$

Finally, we get  $E_\sigma(\prod_{k=1}^r h(x_{\sigma \cdot i_1^k}, \dots, x_{\sigma \cdot i_d^k})) =$

$$\frac{\sum_{\{(j_1^1, \dots, j_d^1), \dots, (j_1^r, \dots, j_d^r)\} \in [\{(i_1^1, \dots, i_d^1), \dots, (i_1^r, \dots, i_d^r)\}]} \prod_{k=1}^r h(x_{j_1^k}, \dots, x_{j_d^k})}{\text{card}(\{(i_1^1, \dots, i_d^1), \dots, (i_1^r, \dots, i_d^r)\})} \quad (2)$$

**Proposition 2.** The  $r$ -th moment of permutation statistics can be obtained by summing up the product of the data function orbit sum  $h_\lambda$  and the index function orbit sum  $w_\lambda$  over all index orbits, i.e.,

$$E_\sigma(T^r(x)) = \sum_{\lambda \in L} \frac{w_\lambda h_\lambda}{\text{card}([\lambda])}, \quad (3)$$

where  $\lambda = \{(i_1^1, \dots, i_d^1), \dots, (i_1^r, \dots, i_d^r)\}$  is a representative index paragraph,  $[\lambda]$  is the index orbit including index paragraph  $\lambda$ , and  $L$  is a transversal of all index orbits. The data function orbit sum is

$$h_\lambda = \sum_{\{(j_1^1, \dots, j_d^1), \dots, (j_1^r, \dots, j_d^r)\} \in [\lambda]} \prod_{k=1}^r h(x_{j_1^k}, \dots, x_{j_d^k}), \quad (4)$$

and the index function orbit sum is

$$w_\lambda = \sum_{\{(j_1^1, \dots, j_d^1), \dots, (j_1^r, \dots, j_d^r)\} \in [\lambda]} \prod_{k=1}^r w(j_1^k, \dots, j_d^k). \quad (5)$$

**Proof:** With Proposition 1,  $E_\sigma(\prod_{k=1}^r h(x_{\pi(i_1^k)}, \dots, x_{\pi(i_d^k)}))$  is invariant within each equivalent index subset, therefore,

$$\begin{aligned}
E_\sigma(T^r(x)) &= \sum_{i_1^1, \dots, i_d^1, \dots, i_1^r, \dots, i_d^r} \left\{ \left( \prod_{k=1}^r w(i_1^k, \dots, i_d^k) \right) E_\sigma \left( \prod_{k=1}^r h(x_{\sigma \cdot i_1^k}, \dots, x_{\sigma \cdot i_d^k}) \right) \right\} \\
&= \sum_{\lambda \in L} \sum_{\{(j_1^1, \dots, j_d^1), \dots, (j_1^r, \dots, j_d^r)\} \in [\lambda]} \left\{ \left( \prod_{k=1}^r w(j_1^k, \dots, j_d^k) \right) E_\sigma \left( \prod_{k=1}^r h(x_{\sigma \cdot j_1^k}, \dots, x_{\sigma \cdot j_d^k}) \right) \right\} \\
&= \sum_{\lambda \in L} \sum_{\{(j_1^1, \dots, j_d^1), \dots, (j_1^r, \dots, j_d^r)\} \in [\lambda]} \left\{ \prod_{k=1}^r w(j_1^k, \dots, j_d^k) \frac{h_\lambda}{\text{card}([\lambda])} \right\} = \sum_{\lambda \in L} \frac{w_\lambda h_\lambda}{\text{card}([\lambda])}. \quad (6)
\end{aligned}$$

**Proposition 3.** The transversal of  $G^* \parallel U_d^{r*}$  is also a transversal of  $G \parallel U_d^r$ .

**Proof:** We define a mapping  $\theta : G \parallel U_d^r \mapsto G^* \parallel U_d^{r*}$  as follow:

$$\begin{aligned} & \forall \{(i_1^1, \dots, i_d^1), \dots, (i_1^r, \dots, i_d^r)\} \in U_d^r \\ & \theta[\{(i_1^1, \dots, i_d^1), \dots, (i_1^r, \dots, i_d^r)\}] := [(\sigma_\theta, e_r, e_d, \dots, e_d)\{(i_1^1, \dots, i_d^1), \dots, (i_1^r, \dots, i_d^r)\}] \\ & = [(\sigma_\theta(i_1^1), \dots, \sigma_\theta(i_d^1)), \dots, (\sigma_\theta(i_1^r), \dots, \sigma_\theta(i_d^r))] \\ & = [(\sigma_\theta^*(i_1^1), \dots, \sigma_\theta^*(i_d^1)), \dots, (\sigma_\theta^*(i_1^r), \dots, \sigma_\theta^*(i_d^r))] \in G^* \parallel U_d^{r*}, \end{aligned}$$

where  $\sigma_\theta \in S_n : U_d^r \mapsto U_d^{r*}$  permutes the smallest index value of  $\{(i_1^1, \dots, i_d^1), \dots, (i_1^r, \dots, i_d^r)\}$  to 1, permutes the second smallest index value to 2, and so on.

First, we prove the mapping  $\theta$  is well-defined. We choose any two index paragraphs belonging to the same orbit,  $[(i_1^1, \dots, i_d^1), \dots, (i_1^r, \dots, i_d^r)] = [(j_1^1, \dots, j_d^1), \dots, (j_1^r, \dots, j_d^r)]$ . So there exists a  $g = (\sigma, \tau, \pi_1, \dots, \pi_r) \in G$  such that,

$$\{(i_1^1, \dots, i_d^1), \dots, (i_1^r, \dots, i_d^r)\} = (\sigma, \tau, \pi_1, \dots, \pi_r)\{(j_1^1, \dots, j_d^1), \dots, (j_1^r, \dots, j_d^r)\}.$$

By applying the mapping  $\theta$  with  $g1_\theta = (\sigma1_\theta, e_r, e_d, \dots, e_d)$  and  $g2_\theta = (\sigma2_\theta, e_r, e_d, \dots, e_d)$ , we have

$$\begin{aligned} & \{(i_1^{*1}, \dots, i_d^{*1}), \dots, (i_1^{*r}, \dots, i_d^{*r})\} = g1_\theta\{(i_1^1, \dots, i_d^1), \dots, (i_1^r, \dots, i_d^r)\}, \\ & \{(j_1^{*1}, \dots, j_d^{*1}), \dots, (j_1^{*r}, \dots, j_d^{*r})\} = g2_\theta\{(j_1^1, \dots, j_d^1), \dots, (j_1^r, \dots, j_d^r)\}, \text{ and} \\ & \{(i_1^{*1}, \dots, i_d^{*1}), \dots, (i_1^{*r}, \dots, i_d^{*r})\} = g1_\theta g g2_\theta^{-1}\{(j_1^{*1}, \dots, j_d^{*1}), \dots, (j_1^{*r}, \dots, j_d^{*r})\}, \end{aligned}$$

where  $g1_\theta g g2_\theta^{-1} = (\sigma1_\theta \sigma \sigma2_\theta^{-1}, \tau, \pi_1, \dots, \pi_r)$ .

Since  $\sigma1_\theta \sigma \sigma2_\theta^{-1} \in S_{dr}$ ,  $g1_\theta g g2_\theta^{-1} = (\sigma1_\theta \sigma \sigma2_\theta^{-1}, \tau, \pi_1, \dots, \pi_r) \in G^*$ , we get

$$[(i_1^{*1}, \dots, i_d^{*1}), \dots, (i_1^{*r}, \dots, i_d^{*r})] = [(\sigma1_\theta \sigma \sigma2_\theta^{-1}, \tau, \pi_1, \dots, \pi_r)\{(j_1^{*1}, \dots, j_d^{*1}), \dots, (j_1^{*r}, \dots, j_d^{*r})\}].$$

Secondly, we prove the mapping  $\theta$  is one-to-one. For the sake of contradiction,

$\forall \{(i_1^1, \dots, i_d^1), \dots, (i_1^r, \dots, i_d^r)\} \neq [(j_1^1, \dots, j_d^1), \dots, (j_1^r, \dots, j_d^r)]$ , we suppose

$$[(i_1^{*1}, \dots, i_d^{*1}), \dots, (i_1^{*r}, \dots, i_d^{*r})] = [(\sigma^*, \tau, \pi_1, \dots, \pi_r)\{(j_1^{*1}, \dots, j_d^{*1}), \dots, (j_1^{*r}, \dots, j_d^{*r})\}],$$

then there exists a  $g^* = (\sigma^*, \tau, \pi_1, \dots, \pi_r) \in G^*$ , such that

$$\{(i_1^{*1}, \dots, i_d^{*1}), \dots, (i_1^{*r}, \dots, i_d^{*r})\} = g^*\{(j_1^{*1}, \dots, j_d^{*1}), \dots, (j_1^{*r}, \dots, j_d^{*r})\}.$$

Therefore,  $\{(i_1^1, \dots, i_d^1), \dots, (i_1^r, \dots, i_d^r)\} = g1_\theta^{-1} g^* g2_\theta \{(j_1^1, \dots, j_d^1), \dots, (j_1^r, \dots, j_d^r)\}$

Similarly, it is strightforward to verify that  $g1_\theta^{-1} g^* g2_\theta \in G$ , we have

$$[(i_1^1, \dots, i_d^1), \dots, (i_1^r, \dots, i_d^r)] = [(\sigma1_\theta \sigma \sigma2_\theta^{-1}, \tau, \pi_1, \dots, \pi_r)\{(j_1^1, \dots, j_d^1), \dots, (j_1^r, \dots, j_d^r)\}], \text{ which causes a contradiction.}$$

Then, we prove the mapping  $\theta$  is onto. This is obvious because  $U_d^{r*} \subset U_d^r$ . A representative of any orbit in  $G^* \parallel U_d^{r*}$  itself is also a representative of the corresponding orbit in  $G \parallel U_d^r$ .

**Proposition 4.** A transversal of  $S_{dr} \parallel U_d^{r*}$  can be generated by all possible mergings of  $\{(1, \dots, d), \dots, (d(r-1) + 1, \dots, dr)\}^s$ .

**Proof:** It is easy to verify that  $\{(1, \dots, d), \dots, (d(r-1) + 1, \dots, dr)\}^s$  is an orbit of  $S_{dr} \parallel U_d^{r*}$ . Here,  $\{(1, \dots, d), \dots, (d(r-1) + 1, \dots, dr)\}^s$  denotes the orbit that all  $dr$  index words have distinct index values. Since the group action  $S_{dr} \times U_d^{r*} \rightarrow U_d^{r*}$  prohibits any shuffling of index words and allows permutation of index values, each orbit of  $S_{dr} \parallel U_d^{r*}$  is determined by which index words have the same index values. This is equivalent to merging the corresponding index words. For example, starting from  $\{(1, 2)(3, 4)\}^s$ , we can get the orbit of  $\{(1, 2)(1, 2)\}^s$  by merging 1 and 3, and 2 and 4.

**Proposition 5.** Enumerating a transversal of  $S_{dr} \times S_{dr} \parallel U_d^{r*}$  is equivalent to the integer partition of  $dr$ .

**Proof:** Since the group action  $S_{dr} \times S_{dr} \times U_d^{r*} \rightarrow U_d^{r*}$  allows free shuffling of index words and permutation of index values, the order of index words does not matter now. Each orbit of  $S_{dr} \times S_{dr} \parallel U_d^{r*}$  is determined by how many (not which) index words have the same index values. For example,  $\{(1, 2)(1, 2)\}^l = \{(1, 2)(2, 1)\}^l = \{(1, 1)(2, 2)\}^l$ . This is equivalent to the integer partition of  $dr$ . In the previous example,  $\{(1, 2)(1, 2)\}^l$  corresponds to the integer partition

of  $4 = 2 + 2$ .

**Proposition 6.** The index function orbit sum  $w_\lambda$  can be calculated by subtracting all lower order orbit sums from the corresponding relaxed index function orbit sum  $w_\lambda^*$ , i.e.,  $w_\lambda = w_\lambda^* - \sum_{\nu \prec \lambda} w_\nu \frac{\#(\lambda)}{\#(\nu)} \#(\lambda \rightarrow \nu)$ . The cardinality of  $[\lambda]$  is  $\#(\lambda)n(n-1)\cdots(n-q+1)$ , where  $q$  is the number of distinct values in  $\lambda$ . The calculation of the data index function orbit sum  $h_\lambda$  is similar.

**Proof:** In order to calculate  $w_\lambda$ , we can calculate the relaxed orbit sum  $w_\lambda^*$  first, then exclude all terms violating the inequality constraint. Note that each relaxed orbit sum includes all orbit sums that have lower symmetric orders. Since each orbit  $[(\lambda)]$  includes  $\#(\lambda)$  different  $[(\lambda)]^s$  and violating the inequality constraint in a relaxed orbit sum is equivalent to all sorts of merging operations,  $w_\lambda = w_\lambda^* - \sum_{\nu \prec \lambda} w_\nu \frac{\#(\lambda)}{\#(\nu)} \#(\lambda \rightarrow \nu)$ . It is obvious that there are  $n(n-1)\cdots(n-q+1)$  index words within each  $[(\lambda)]^s$ . Therefore, the cardinality of  $[\lambda]$  is  $\#(\lambda)n(n-1)\cdots(n-q+1)$ .

**Proposition 7.** For  $d \geq 2$ , let  $m(m-1)/2 \leq rd(d-1)/2 < (m+1)m/2$ , where  $r$  is the order of moment and  $m$  is an integer. For a  $d$ -th order weighted  $v$ -statistic, the computational cost of the orbit sum for the  $r$ -th moment is bounded by  $O(n^m)$ . When  $d = 1$ , the computational complexity of the orbit sum is  $O(n)$ .

**Proof:** As we know, the main computational cost comes from computing relaxed data function orbit sums. When  $d = 1$ , each relaxed sum can be represented by a polynomial of power sums, thus the computational complexity is  $O(n)$ . When  $d \geq 2$ , the computational complexity depends on the largest symmetric subgraph among all relaxed index orbit graph representations needed for the  $r$ -th moment. Since there are at most  $rd(d-1)/2$  edges connecting distinct index words, the computational cost of the orbit sum for the  $r$ -th moment is bounded by  $O(n^m)$ , where  $m$  is a integer that satisfies  $m(m-1)/2 \leq rd(d-1)/2 < (m+1)m/2$ .

**Proposition 8.** We can obtain the  $r$ -th moment of bootstrapping weighted  $v$ -statistics by summing up the product of the index function orbit sum  $w_\lambda$  and the relaxed data function orbit sum  $h_\lambda^*$  over all index orbits, i.e.,

$$E_\sigma(T^r(x)) = \sum_{\lambda \in L} \frac{w_\lambda h_\lambda^*}{\text{card}([\lambda^*])}, \quad (7)$$

where  $\sigma \in \text{End}_n$ ,  $\text{card}([\lambda^*]) = \#(\lambda)n^q$ , and  $q$  is the number of distinct values in  $\lambda$ .

**Proof:** Similar to proposition 1, we divide the index set  $U_d^r$  into index orbits  $G \parallel U_d^r$  by  $G := S_n \times S_r \times S_d^r$  acting on  $U_d^r$ , not monoid action  $H \times U_d^r \rightarrow U_d^r$ . Therefore,

$$\begin{aligned} E_\sigma(T^r(x)) &= \sum_{i_1^1, \dots, i_d^1, \dots, i_1^r, \dots, i_d^r} \left\{ \left( \prod_{k=1}^r w(i_1^k, \dots, i_d^k) \right) E_\sigma \left( \prod_{k=1}^r h(x_{\sigma \cdot i_1^k}, \dots, x_{\sigma \cdot i_d^k}) \right) \right\} \\ &= \sum_{\lambda \in L} \sum_{\{(j_1^1, \dots, j_d^1), \dots, (j_1^r, \dots, j_d^r)\} \in [\lambda]} \left\{ \left( \prod_{k=1}^r w(j_1^k, \dots, j_d^k) \right) E_\sigma \left( \prod_{k=1}^r h(x_{\sigma \cdot j_1^k}, \dots, x_{\sigma \cdot j_d^k}) \right) \right\} \end{aligned}$$

It is obvious that each index paragraph is mapped to a same index subset (we call it bootstrap index subset) by the monoid action  $H \times U_d^r \rightarrow U_d^r$  since  $\sigma \in \text{End}_n$  is uniformly distributed. For resampling with replacement, there are  $\text{card}([\lambda^*]) = \#(\lambda)n^q$  index paragraphs within the bootstrap index subset.  $E_\sigma(\prod_{k=1}^r h(x_{\sigma \cdot j_1^k}, \dots, x_{\sigma \cdot j_d^k}))$  is equivalent to the corresponding relaxed data function sum  $h_\lambda^*$  divided by  $\text{card}([\lambda^*])$ , i.e.,  $E_\sigma(\prod_{k=1}^r h(x_{\sigma \cdot j_1^k}, \dots, x_{\sigma \cdot j_d^k})) = \frac{h_\lambda^*}{\text{card}([\lambda^*])}$ .

Therefore,  $E_\sigma(T^r(x)) = \sum_{\lambda \in L} \frac{w_\lambda h_\lambda^*}{\text{card}([\lambda^*])}$ .

### First order test statistics

The first moment

$$[U_1^1] = [\{1\}] \quad (8)$$

$$w_{[\{1\}]} = \sum_{i \in [\{1\}]} w(i) = \sum_i w(i) \quad (9)$$

$$E(T) = \frac{h_{[\{1\}]}}{\#([\{1\}])} w_{[\{1\}]} = \frac{h_{[\{1\}]}}{n} w_{[\{1\}]} \quad (10)$$

The second moment

$$[U_1^2] = [\{1, 1\}] \cup [\{1, 2\}] \quad (11)$$

$$w_{[\{1,1\}]} = \sum_{i_1, i_2 \in [\{1,1\}]} w(i_1)w(i_2) = \sum_i w(i)^2 \quad (12)$$

$$w_{[\{1,2\}]}^* = \sum_{i_1, i_2} w(i_1)w(i_2) = \left(\sum_i w(i)\right)^2 \quad (13)$$

$$w_{[\{1,2\}]} = \sum_{i_1, i_2 \in [\{1,2\}]} w(i_1)w(i_2) = w_{[\{1,2\}]}^* - \frac{1}{1} \times 1 \times w_{[\{1,1\}]} \quad (14)$$

$$\begin{aligned} E(T^2) &= \frac{h_{[\{1,1\}]}}{\#([\{1,1\}])} w_{[\{1,1\}]} + \frac{h_{[\{1,2\}]}}{\#([\{1,2\}])} w_{[\{1,2\}]} \\ &= \frac{h_{[\{1,1\}]}}{n} w_{[\{1,1\}]} + \frac{h_{[\{1,2\}]}}{n(n-1)} w_{[\{1,2\}]} \end{aligned} \quad (15)$$

The third moment

$$[U_1^3] = [\{1, 1, 1\}] \cup [\{1, 1, 2\}] \cup [\{1, 2, 3\}] \quad (16)$$

$$w_{[\{1,1,1\}]} = \sum_{i_1, i_2, i_3 \in [\{1,1,1\}]} w(i_1)w(i_2)w(i_3) = \sum_i w(i)^3 \quad (17)$$

$$w_{[\{1,1,2\}]}^* = 3 \times \sum_{i,j} w(i)^2 w(j) = 3 \times \left(\sum_i w(i)^2\right) \left(\sum_j w(j)\right) \quad (18)$$

$$w_{[\{1,1,2\}]} = \sum_{i_1, i_2, i_3 \in [\{(1,1,2)\}]} w(i_1)w(i_2)w(i_3) = w_{[\{1,1,2\}]}^* - \frac{3}{1} \times 1 \times w_{[\{(1,1,1)\}]} \quad (19)$$

$$w_{[\{1,2,3\}]}^* = \sum_{i,j,k} w(i)w(j)w(k) = \left(\sum_i w(i)\right)^3 \quad (20)$$

$$w_{[\{1,2,3\}]} = w_{[\{1,2,3\}]}^* - w_{[\{1,1,2\}]} - w_{[\{1,1,1\}]} \quad (21)$$

$$\begin{aligned} E(T^3) &= \frac{h_{[\{1,1,1\}]}}{\#([\{1,1,1\}])} w_{[\{1,1,1\}]} + \frac{h_{[\{1,1,2\}]}}{\#([\{1,1,2\}])} w_{[\{1,1,2\}]} + \frac{h_{[\{1,2,3\}]}}{\#([\{1,2,3\}])} w_{[\{1,2,3\}]} \\ &= \frac{h_{[\{1,1,1\}]}}{n} w_{[\{1,1,1\}]} + \frac{h_{[\{1,1,2\}]}}{3n(n-1)} w_{[\{1,1,2\}]} + \frac{h_{[\{1,2,3\}]}}{n(n-1)(n-2)} w_{[\{1,2,3\}]} \end{aligned} \quad (22)$$

The fourth moment

$$[U_1^4] = [\{1, 1, 1, 1\}] \cup [\{1, 1, 1, 2\}] \cup [\{1, 1, 2, 2\}] \cup [\{1, 1, 2, 3\}] \cup [\{1, 2, 3, 4\}] \quad (23)$$

$$w_{[\{1,1,1,1\}]} = \sum_{i_1, i_2, i_3, i_4 \in [\{1,1,1,1\}]} w(i_1)w(i_2)w(i_3)w(i_4) = \sum_i w(i)^4 \quad (24)$$

$$w_{[\{1,1,1,2\}]}^* = 4 \times \sum_{i,j} w(i)^3 w(j) = 4 \times \left(\sum_i w(i)^3\right) \left(\sum_j w(j)\right) \quad (25)$$

$$\begin{aligned}
w_{\{(1,1,1,2)\}} &= \sum_{i_1, i_2, i_3, i_4 \in \{(1,1,1,2)\}} w(i_1)w(i_2)w(i_3)w(i_4) \\
&= w_{\{(1,1,1,2)\}}^* - \frac{4}{1} \times 1 \times w_{\{(1,1,1,1)\}}
\end{aligned} \tag{26}$$

$$w_{\{(1,1,2,2)\}}^* = 3 \times \sum_{i,j} w(i)^2 w(j)^2 = 3 \times \left( \sum_i w(i)^2 \right)^2 \tag{27}$$

$$\begin{aligned}
w_{\{(1,1,2,2)\}} &= \sum_{i_1, i_2, i_3, i_4 \in \{(1,1,2,2)\}} w(i_1)w(i_2)w(i_3)w(i_4) \\
&= w_{\{(1,1,2,2)\}}^* - \frac{3}{1} \times 1 \times w_{\{(1,1,1)\}}
\end{aligned} \tag{28}$$

$$w_{\{(1,1,2,3)\}}^* = 6 \times \sum_{i,j,k} w(i)^2 w(j)w(k) = 6 \times \left( \sum_i w(i)^2 \right) \left( \sum_j w(j) \right)^2 \tag{29}$$

$$\begin{aligned}
w_{\{(1,1,2,3)\}} &= \sum_{i_1, i_2, i_3, i_4 \in \{(1,1,2,3)\}} w(i_1)w(i_2)w(i_3)w(i_4) \\
&= w_{\{(1,1,2,3)\}}^* - \frac{6}{3} \times 1 \times w_{\{(1,1,2,2)\}} - \frac{6}{4} \times 2 \times w_{\{(1,1,1,2)\}} - \frac{6}{1} \times 1 \times w_{\{(1,1,1,1)\}}
\end{aligned} \tag{30}$$

$$w_{\{(1,2,3,4)\}}^* = \sum_{i,j,k,l} w(i)w(j)w(k)w(l) = \left( \sum_i w(i) \right)^4 \tag{31}$$

$$w_{\{(1,2,3,4)\}} = w_{\{(1,2,3,4)\}}^* - w_{\{(1,1,2,3)\}} - w_{\{(1,1,2,2)\}} - w_{\{(1,1,1,2)\}} - w_{\{(1,1,1,1)\}} \tag{32}$$

## second order test statistics

The first moment

$$[U_2^1] = [\{(1,1)\}] \bigcup [\{(1,2)\}] \tag{33}$$

$$w_{[\{(1,1)\}]} = \sum_{i_1, i_2 \in [\{(1,1)\}]} w(i_1, i_2) = \sum_i w(i, i) \tag{34}$$

$$w_{[\{(1,2)\}]}^* = \sum_{i_1, i_2} w(i_1, i_2) \tag{35}$$

$$w_{[\{(1,2)\}]} = \sum_{i_1, i_2 \in [\{(1,2)\}]} w(i_1, i_2) = w_{[\{(1,2)\}]}^* - \frac{1}{1} \times 1 \times w_{[\{(1,1)\}]} \tag{36}$$

$$\begin{aligned}
E(T) &= \frac{h_{[\{(1,1)\}]}}{\#([\{(1,1)\}])} w_{[\{(1,1)\}]} + \frac{h_{[\{(1,2)\}]}}{\#([\{(1,2)\}])} w_{[\{(1,2)\}]} \\
&= \frac{h_{[\{(1,1)\}]}}{n} w_{[\{(1,1)\}]} + \frac{h_{[\{(1,2)\}]}}{n(n-1)} w_{[\{(1,2)\}]}
\end{aligned} \tag{37}$$

The second moment

$$\begin{aligned}
[U_2^2] &= [\{(1,1)(1,1)\}] \bigcup [\{(1,1)(1,2)\}] \bigcup [\{(1,1)(2,2)\}] \bigcup [\{(1,2)(1,2)\}] \\
&\quad \bigcup [\{(1,1)(2,3)\}] \bigcup [\{(1,2)(1,3)\}] \bigcup [\{(1,2)(3,4)\}]
\end{aligned} \tag{38}$$

$$w_{[\{(1,1)(1,1)\}]} = \sum_{i_1, i_2, i_3, i_4 \in [\{(1,1)(1,1)\}]} w(i_1, i_2)w(i_3, i_4) = \sum_i w(i, i)^2 \tag{39}$$

$$w_{[\{(1,1)(1,2)\}]}^* = 4 \times \sum_{i,j} w(i, i)w(i, j) \tag{40}$$

$$w_{[\{(1,1)(1,2)\}]} = w_{[\{(1,1)(1,2)\}]}^* - \frac{4}{1} \times 1 \times w_{[\{(1,1)(1,1)\}]} \quad (41)$$

$$w_{[\{(1,1)(2,2)\}]}^* = \sum_{i,j} w(i,i)w(j,j) = \left(\sum_i w(i,i)\right)^2 \quad (42)$$

$$w_{[\{(1,1)(2,2)\}]} = w_{[\{(1,1)(2,2)\}]}^* - \frac{1}{1} \times 1 \times w_{[\{(1,1)(1,1)\}]} \quad (43)$$

$$w_{[\{(1,2)(1,2)\}]}^* = 2 \times \sum_{i,j} w(i,j)^2 \quad (44)$$

$$w_{[\{(1,2)(1,2)\}]} = w_{[\{(1,2)(1,2)\}]}^* - \frac{2}{1} \times 1 \times w_{[\{(1,1)(1,1)\}]} \quad (45)$$

$$w_{[\{(1,1)(2,3)\}]}^* = 2 \times \sum_{i,j,k} w(i,i)w(j,k) \quad (46)$$

$$w_{[\{(1,1)(2,3)\}]} = w_{[\{(1,1)(2,3)\}]}^* - \frac{2}{1} \times 1 \times w_{[\{(1,1)(2,2)\}]} - \frac{2}{4} \times 2 \times w_{[\{(1,1)(1,2)\}]} - \frac{2}{1} \times 1 \times w_{[\{(1,1)(1,1)\}]} \quad (47)$$

$$w_{[\{(1,2)(1,3)\}]}^* = 4 \times \sum_{i,j,k} w(i,j)w(i,k) \quad (48)$$

$$w_{[\{(1,2)(1,3)\}]} = w_{[\{(1,2)(1,3)\}]}^* - \frac{4}{2} \times 1 \times w_{[\{(1,2)(1,2)\}]} - \frac{4}{4} \times 2 \times w_{[\{(1,1)(1,2)\}]} - \frac{4}{1} \times 1 \times w_{[\{(1,1)(1,1)\}]} \quad (49)$$

$$w_{[\{(1,2)(3,4)\}]}^* = \sum_{i,j,k,l} w(i,j)w(k,l) = \left(\sum_{i,j} w(i,j)\right)^2 \quad (50)$$

$$w_{[\{(1,2)(3,4)\}]} = w_{[\{(1,2)(3,4)\}]}^* - w_{[\{(1,2)(1,3)\}]} - w_{[\{(1,1)(2,3)\}]} - w_{[\{(1,2)(1,2)\}]} - w_{[\{(1,1)(2,2)\}]} - w_{[\{(1,1)(1,2)\}]} - w_{[\{(1,1)(1,1)\}]} \quad (51)$$

$$\begin{aligned} E(T^2) &= \frac{h_{[\{(1,1)(1,1)\}]} }{\#([\{(1,1)(1,1)\}])} w_{[\{(1,1)(1,1)\}]} + \frac{h_{[\{(1,1)(1,2)\}]} }{\#([\{(1,1)(1,2)\}])} w_{[\{(1,1)(1,2)\}]} \\ &+ \frac{h_{[\{(1,1)(2,2)\}]} }{\#([\{(1,1)(2,2)\}])} w_{[\{(1,1)(2,2)\}]} + \frac{h_{[\{(1,2)(1,2)\}]} }{\#([\{(1,2)(1,2)\}])} w_{[\{(1,2)(1,2)\}]} \\ &+ \frac{h_{[\{(1,1)(2,3)\}]} }{\#([\{(1,1)(2,3)\}])} w_{[\{(1,1)(2,3)\}]} + \frac{h_{[\{(1,2)(1,3)\}]} }{\#([\{(1,2)(1,3)\}])} w_{[\{(1,2)(1,3)\}]} \\ &+ \frac{h_{[\{(1,2)(3,4)\}]} }{\#([\{(1,2)(3,4)\}])} w_{[\{(1,2)(3,4)\}]} \\ &= \frac{h_{[\{(1,1)(1,1)\}]} }{n} w_{[\{(1,1)(1,1)\}]} + \frac{h_{[\{(1,1)(1,2)\}]} }{4n(n-1)} w_{[\{(1,1)(1,2)\}]} \\ &+ \frac{h_{[\{(1,1)(2,2)\}]} }{n(n-1)} w_{[\{(1,1)(2,2)\}]} + \frac{h_{[\{(1,2)(1,2)\}]} }{2n(n-1)} w_{[\{(1,2)(1,2)\}]} \\ &+ \frac{h_{[\{(1,1)(2,3)\}]} }{2n(n-1)(n-2)} w_{[\{(1,1)(2,3)\}]} + \frac{h_{[\{(1,2)(1,3)\}]} }{4n(n-1)(n-2)} w_{[\{(1,2)(1,3)\}]} \\ &+ \frac{h_{[\{(1,2)(3,4)\}]} }{n(n-1)(n-2)(n-3)} w_{[\{(1,2)(3,4)\}]} \end{aligned} \quad (52)$$

The third moment

$$\begin{aligned} [U_2^3] &= [\{(1,1)(1,1)(1,1)\}] \cup [\{(1,1)(1,1)(1,2)\}] \cup [\{(1,1)(1,1)(2,2)\}] \\ &\cup [\{(1,1)(1,2)(1,2)\}] \cup [\{(1,1)(1,2)(2,2)\}] \cup [\{(1,2)(1,2)(1,2)\}] \\ &\cup [\{(1,1)(1,1)(2,3)\}] \cup [\{(1,1)(1,2)(1,3)\}] \cup [\{(1,1)(1,2)(3,3)\}] \end{aligned}$$

$$\begin{aligned}
& \bigcup \{ (1,2)(1,2)(1,3) \} \bigcup \{ (1,1)(1,2)(2,3) \} \bigcup \{ (1,1)(2,2)(3,3) \} \\
& \bigcup \{ (1,1)(2,3)(2,3) \} \bigcup \{ (1,2)(1,3)(2,3) \} \bigcup \{ (1,2)(1,3)(1,4) \} \\
& \bigcup \{ (1,1)(1,2)(3,4) \} \bigcup \{ (1,1)(2,2)(3,4) \} \bigcup \{ (1,1)(2,3)(2,4) \} \\
& \bigcup \{ (1,2)(1,2)(3,4) \} \bigcup \{ (1,2)(1,3)(2,4) \} \bigcup \{ (1,1)(2,3)(4,5) \} \\
& \bigcup \{ (1,2)(1,3)(4,5) \} \bigcup \{ (1,2)(3,4)(5,6) \}
\end{aligned} \tag{53}$$

$$w_{\{(1,1)(1,1)(1,1)\}} = \sum_{i_1, i_2, i_3, i_4, i_5, i_6 \in \{(1,1)(1,1)(1,1)\}} w(i_1, i_2) w(i_3, i_4) w(i_5, i_6) = \sum_i w(i, i)^3 \tag{54}$$

$$w_{\{(1,1)(1,1)(1,2)\}}^* = 6 \times \sum_{i,j} w(i, i)^2 w(i, j) = 6 \times \sum_i (w(i, i)^2 \sum_j w(i, j)) \tag{55}$$

$$w_{\{(1,1)(1,1)(1,2)\}} = w_{\{(1,1)(1,1)(1,2)\}}^* - \frac{6}{1} \times 1 \times w_{\{(1,1)(1,1)(1,1)\}} \tag{56}$$

$$w_{\{(1,1)(1,1)(2,2)\}}^* = 3 \times \sum_{i,j} w(i, i)^2 w(j, j) = 3 \times (\sum_i w(i, i)^2) (\sum_i w(i, i)) \tag{57}$$

$$w_{\{(1,1)(1,1)(2,2)\}} = w_{\{(1,1)(1,1)(2,2)\}}^* - \frac{3}{1} \times 1 \times w_{\{(1,1)(1,1)(1,1)\}} \tag{58}$$

$$w_{\{(1,1)(1,2)(1,2)\}}^* = 12 \times \sum_{i,j} w(i, i) w(i, j)^2 = 12 \times \sum_i (w(i, i) \sum_j w(i, j)^2) \tag{59}$$

$$w_{\{(1,1)(1,2)(1,2)\}} = w_{\{(1,1)(1,2)(1,2)\}}^* - \frac{12}{1} \times 1 \times w_{\{(1,1)(1,1)(1,1)\}} \tag{60}$$

$$\begin{aligned}
w_{\{(1,1)(1,2)(2,2)\}}^* &= 6 \times \sum_{i,j} w(i, i) w(i, j) w(j, j) \\
&= 6 \times \sum_i (w(i, i) \sum_j w(i, j) w(j, j))
\end{aligned} \tag{61}$$

$$w_{\{(1,1)(1,2)(2,2)\}} = w_{\{(1,1)(1,2)(2,2)\}}^* - \frac{6}{1} \times 1 \times w_{\{(1,1)(1,1)(1,1)\}} \tag{62}$$

$$w_{\{(1,2)(1,2)(1,2)\}}^* = 4 \times \sum_{i,j} w(i, j)^3 \tag{63}$$

$$w_{\{(1,2)(1,2)(1,2)\}} = w_{\{(1,2)(1,2)(1,2)\}}^* - \frac{4}{1} \times 1 \times w_{\{(1,1)(1,1)(1,1)\}} \tag{64}$$

$$w_{\{(1,1)(1,1)(2,3)\}}^* = 3 \times \sum_{i,j,k} w(i, i)^2 w(j, k) = 3 \times (\sum_i w(i, i)^2) (\sum_{j,k} w(j, k)) \tag{65}$$

$$\begin{aligned}
w_{\{(1,1)(1,1)(2,3)\}} &= w_{\{(1,1)(1,1)(2,3)\}}^* - \frac{3}{3} \times 1 \times w_{\{(1,1)(1,1)(2,2)\}} \\
&\quad - \frac{3}{6} \times 2 \times w_{\{(1,1)(1,1)(1,2)\}} - \frac{3}{1} \times 1 \times w_{\{(1,1)(1,1)(1,1)\}}
\end{aligned} \tag{66}$$

$$w_{\{(1,1)(1,2)(1,3)\}}^* = 12 \times \sum_{i,j,k} w(i, i) w(i, j) w(i, k) = 12 \times \sum_i (w(i, i) (\sum_j w(i, j)^2)) \tag{67}$$

$$\begin{aligned}
w_{\{(1,1)(1,2)(1,3)\}} &= w_{\{(1,1)(1,2)(1,3)\}}^* - \frac{12}{12} \times 1 \times w_{\{(1,1)(1,2)(1,2)\}} \\
&\quad - \frac{12}{6} \times 2 \times w_{\{(1,1)(1,1)(1,2)\}} - \frac{12}{1} \times 1 \times w_{\{(1,1)(1,1)(1,1)\}}
\end{aligned} \tag{68}$$



$$\begin{aligned}
w_{[(1,1)(1,2)(3,3)]}^* &= 12 \times \sum_{i,j,k} w(i,i)w(i,j)w(k,k) \\
&= 12 \times \left( \sum_i (w(i,i) \sum_j w(i,j)) \right) \left( \sum_k w(k,k) \right)
\end{aligned} \tag{69}$$

$$\begin{aligned}
w_{[(1,1)(1,2)(3,3)]} &= w_{[(1,1)(1,2)(3,3)]}^* - \frac{12}{6} \times 1 \times w_{[(1,1)(1,2)(2,2)]} \\
&\quad - \frac{12}{3} \times 1 \times w_{[(1,1)(1,1)(2,2)]} - \frac{12}{6} \times 1 \times w_{[(1,1)(1,1)(1,2)]} \\
&\quad - \frac{12}{1} \times 1 \times w_{[(1,1)(1,1)(1,1)]}
\end{aligned} \tag{70}$$

$$w_{[(1,2)(1,2)(1,3)]}^* = 24 \times \sum_{i,j,k} w(i,j)^2 w(i,k) = 24 \times \sum_i \left( \left( \sum_j w(i,j)^2 \right) \left( \sum_k w(i,k) \right) \right) \tag{71}$$

$$\begin{aligned}
w_{[(1,2)(1,2)(1,3)]} &= w_{[(1,2)(1,2)(1,3)]}^* - \frac{24}{4} \times 1 \times w_{[(1,2)(1,2)(1,2)]} \\
&\quad - \frac{24}{12} \times 1 \times w_{[(1,1)(1,2)(1,2)]} - \frac{24}{6} \times 1 \times w_{[(1,1)(1,1)(1,2)]} \\
&\quad - \frac{24}{1} \times 1 \times w_{[(1,1)(1,1)(1,1)]}
\end{aligned} \tag{72}$$

$$\begin{aligned}
w_{[(1,1)(1,2)(2,3)]}^* &= 24 \times \sum_{i,j,k} w(i,i)w(i,j)w(j,k) \\
&= 24 \times \sum_j \left( \left( \sum_i w(i,i)w(i,j) \right) \left( \sum_k w(j,k) \right) \right)
\end{aligned} \tag{73}$$

$$\begin{aligned}
w_{[(1,1)(1,2)(2,3)]} &= w_{[(1,1)(1,2)(2,3)]}^* - \frac{24}{6} \times 1 \times w_{[(1,1)(1,2)(2,2)]} \\
&\quad - \frac{24}{12} \times 1 \times w_{[(1,1)(1,2)(1,2)]} - \frac{24}{6} \times 1 \times w_{[(1,1)(1,1)(1,2)]} \\
&\quad - \frac{24}{1} \times 1 \times w_{[(1,1)(1,1)(1,1)]}
\end{aligned} \tag{74}$$

$$w_{[(1,1)(2,2)(3,3)]}^* = 1 \times \sum_{i,j,k} w(i,i)w(j,j)w(k,k) = \left( \sum_i w(i,i) \right)^3 \tag{75}$$

$$\begin{aligned}
w_{[(1,1)(2,2)(3,3)]} &= w_{[(1,1)(2,2)(3,3)]}^* - \frac{1}{3} \times 3 \times w_{[(1,1)(1,1)(2,2)]} \\
&\quad - \frac{1}{1} \times 1 \times w_{[(1,1)(1,1)(1,1)]}
\end{aligned} \tag{76}$$

$$w_{[(1,1)(2,3)(2,3)]}^* = 6 \times \sum_{i,j,k} w(i,i)w(j,k)w(j,k) = 6 \times \left( \sum_i w(i,i) \right) \left( \sum_{j,k} w(j,k)^2 \right) \tag{77}$$

$$\begin{aligned}
w_{[(1,1)(2,3)(2,3)]} &= w_{[(1,1)(2,3)(2,3)]}^* - \frac{6}{3} \times 1 \times w_{[(1,1)(1,1)(2,2)]} \\
&\quad - \frac{6}{12} \times 2 \times w_{[(1,1)(1,2)(1,2)]} - \frac{6}{1} \times 1 \times w_{[(1,1)(1,1)(1,1)]}
\end{aligned} \tag{78}$$

$$\begin{aligned}
w_{[(1,2)(1,3)(2,3)]}^* &= 8 \times \sum_{i,j,k} w(i,j)w(j,k)w(i,k) \\
&= 8 \times \sum_{i,j} w(i,j) \left( \sum_k w(j,k)w(i,k) \right)
\end{aligned} \tag{79}$$

$$\begin{aligned}
w_{[(1,2)(1,3)(2,3)]} &= w_{[(1,2)(1,3)(2,3)]}^* - \frac{8}{12} \times 3 \times w_{[(1,1)(1,2)(1,2)]} \\
&\quad - \frac{8}{1} \times 1 \times w_{[(1,1)(1,1)(1,1)]}
\end{aligned} \tag{80}$$

$$w_{\{(1,2)(1,3)(1,4)\}}^* = 8 \times \sum_{i,j,k,l} w(i,j)w(i,k)w(i,l) = 8 \times \sum_i \left( \sum_j w(i,j) \right)^3 \quad (81)$$

$$\begin{aligned} w_{\{(1,2)(1,3)(1,4)\}} &= w_{\{(1,2)(1,3)(1,4)\}}^* - \frac{8}{24} \times 3 \times w_{\{(1,2)(1,2)(1,3)\}} \\ &\quad - \frac{8}{12} \times 3 \times w_{\{(1,1)(1,2)(1,3)\}} - \frac{8}{4} \times 1 \times w_{\{(1,2)(1,2)(1,2)\}} \\ &\quad - \frac{8}{12} \times 3 \times w_{\{(1,1)(1,2)(1,2)\}} - \frac{8}{6} \times 3 \times w_{\{(1,1)(1,1)(1,2)\}} \\ &\quad - \frac{8}{1} \times 1 \times w_{\{(1,1)(1,1)(1,1)\}} \end{aligned} \quad (82)$$

$$\begin{aligned} w_{\{(1,1)(1,2)(3,4)\}}^* &= 12 \times \sum_{i,j,k,l} w(i,i)w(i,j)w(k,l) \\ &= 12 \times \left( \sum_{i,j} w(i,i)w(i,j) \right) \left( \sum_{k,l} w(k,l) \right) \end{aligned} \quad (83)$$

$$\begin{aligned} w_{\{(1,1)(1,2)(3,4)\}} &= w_{\{(1,1)(1,2)(3,4)\}}^* - \frac{12}{24} \times 2 \times w_{\{(1,1)(1,2)(2,3)\}} \\ &\quad - \frac{12}{12} \times 1 \times w_{\{(1,1)(1,2)(3,3)\}} - \frac{12}{3} \times 1 \times w_{\{(1,1)(1,1)(2,3)\}} \\ &\quad - \frac{12}{12} \times 2 \times w_{\{(1,1)(1,2)(1,3)\}} - \frac{12}{6} \times 1 \times w_{\{(1,1)(1,2)(2,2)\}} \\ &\quad - \frac{12}{3} \times 1 \times w_{\{(1,1)(1,1)(2,2)\}} - \frac{12}{12} \times 2 \times w_{\{(1,1)(1,2)(1,2)\}} \\ &\quad - \frac{12}{6} \times 3 \times w_{\{(1,1)(1,1)(1,2)\}} - \frac{12}{1} \times 1 \times w_{\{(1,1)(1,1)(1,1)\}} \\ &\quad w_{\{(1,1)(2,2)(3,4)\}}^* = 3 \times \sum_{i,j,k,l} w(i,i)w(j,j)w(k,l) \end{aligned} \quad (84)$$

$$= 3 \times \left( \sum_i w(i,i) \right)^2 \left( \sum_{k,l} w(k,l) \right) \quad (85)$$

$$\begin{aligned} w_{\{(1,1)(2,2)(3,4)\}} &= w_{\{(1,1)(2,2)(3,4)\}}^* - \frac{3}{1} \times 1 \times w_{\{(1,1)(2,2)(3,3)\}} \\ &\quad - \frac{3}{12} \times 4 \times w_{\{(1,1)(1,2)(3,3)\}} - \frac{3}{3} \times 1 \times w_{\{(1,1)(1,1)(2,3)\}} \\ &\quad - \frac{3}{6} \times 2 \times w_{\{(1,1)(1,2)(2,2)\}} - \frac{3}{3} \times 3 \times w_{\{(1,1)(1,1)(2,2)\}} \\ &\quad - \frac{3}{6} \times 2 \times w_{\{(1,1)(1,1)(1,2)\}} - \frac{3}{1} \times 1 \times w_{\{(1,1)(1,1)(1,1)\}} \end{aligned} \quad (86)$$

$$w_{\{(1,1)(2,3)(2,4)\}}^* = 12 \times \sum_{i,j,k,l} w(i,i)w(j,k)w(j,l)$$

$$= 12 \times \left( \sum_i w(i,i) \right) \left( \sum_j \left( \sum_k w(j,k) \right)^2 \right) \quad (87)$$

$$\begin{aligned} w_{\{(1,1)(2,3)(2,4)\}} &= w_{\{(1,1)(2,3)(2,4)\}}^* - \frac{12}{6} \times 1 \times w_{\{(1,1)(2,3)(2,3)\}} \\ &\quad - \frac{12}{24} \times 2 \times w_{\{(1,1)(1,2)(2,3)\}} - \frac{12}{12} \times 2 \times w_{\{(1,1)(1,2)(3,3)\}} \\ &\quad - \frac{12}{12} \times 1 \times w_{\{(1,1)(1,2)(1,3)\}} - \frac{12}{6} \times 2 \times w_{\{(1,1)(1,2)(2,2)\}} \end{aligned}$$

$$\begin{aligned}
& -\frac{12}{3} \times 1 \times w_{[\{(1,1)(1,1)(2,2)\}]} - \frac{12}{6} \times 2 \times w_{[\{(1,1)(1,1)(1,2)\}]} \\
& - \frac{12}{1} \times 1 \times w_{[\{(1,1)(1,1)(1,1)\}]} \tag{88}
\end{aligned}$$

$$\begin{aligned}
w_{[\{(1,2)(1,2)(3,4)\}]}^* &= 6 \times \sum_{i,j,k,l} w(i,j)w(i,j)w(k,l) \\
&= 6 \times \left( \sum_{i,j} w(i,j)^2 \right) \left( \sum_{k,l} w(k,l) \right) \tag{89}
\end{aligned}$$

$$\begin{aligned}
w_{[\{(1,2)(1,2)(3,4)\}]} &= w_{[\{(1,2)(1,2)(3,4)\}]}^* - \frac{6}{6} \times 1 \times w_{[\{(1,1)(2,3)(2,3)\}]} \\
& - \frac{6}{24} \times 4 \times w_{[\{(1,2)(1,2)(1,3)\}]} - \frac{6}{3} \times 1 \times w_{[\{(1,1)(1,1)(2,3)\}]} \\
& - \frac{6}{4} \times 2 \times w_{[\{(1,2)(1,2)(1,2)\}]} - \frac{6}{12} \times 2 \times w_{[\{(1,1)(1,2)(1,2)\}]} \\
& - \frac{6}{3} \times 1 \times w_{[\{(1,1)(1,1)(2,2)\}]} - \frac{6}{6} \times 2 \times w_{[\{(1,1)(1,1)(1,2)\}]} \\
& - \frac{6}{1} \times 1 \times w_{[\{(1,1)(1,1)(1,1)\}]} \tag{90}
\end{aligned}$$

$$\begin{aligned}
w_{[\{(1,2)(1,3)(2,4)\}]}^* &= 24 \times \sum_{i,j,k,l} w(i,j)w(i,k)w(j,l) \\
&= 24 \times \sum_{i,j} (w(i,j)) \left( \sum_k w(i,k) \right) \left( \sum_l w(j,l) \right) \tag{91}
\end{aligned}$$

$$\begin{aligned}
w_{[\{(1,2)(1,3)(2,4)\}]} &= w_{[\{(1,2)(1,3)(2,4)\}]}^* - \frac{24}{8} \times 1 \times w_{[\{(1,2)(1,3)(2,3)\}]} \\
& - \frac{24}{24} \times 2 \times w_{[\{(1,1)(1,2)(2,3)\}]} - \frac{24}{24} \times 2 \times w_{[\{(1,2)(1,2)(1,3)\}]} \\
& - \frac{24}{12} \times 1 \times w_{[\{(1,1)(1,2)(1,3)\}]} - \frac{24}{6} \times 1 \times w_{[\{(1,1)(1,2)(2,2)\}]} \\
& - \frac{24}{4} \times 1 \times w_{[\{(1,2)(1,2)(1,2)\}]} - \frac{24}{12} \times 3 \times w_{[\{(1,1)(1,2)(1,2)\}]} \\
& - \frac{24}{6} \times 2 \times w_{[\{(1,1)(1,1)(1,2)\}]} - \frac{24}{1} \times 1 \times w_{[\{(1,1)(1,1)(1,1)\}]} \tag{92}
\end{aligned}$$

$$\begin{aligned}
w_{[\{(1,1)(2,3)(4,5)\}]}^* &= 3 \times \sum_{i,j,k,l,m} w(i,i)w(j,k)w(l,m) \\
&= 3 \times \left( \sum_i w(i,i) \right) \left( \sum_{j,k} w(j,k) \right)^2 \tag{93}
\end{aligned}$$

$$\begin{aligned}
w_{[\{(1,1)(2,3)(4,5)\}]} &= w_{[\{(1,1)(2,3)(4,5)\}]}^* - \frac{3}{3} \times 2 \times w_{[\{(1,1)(2,2)(3,4)\}]} \\
& - \frac{3}{12} \times 4 \times w_{[\{(1,1)(2,3)(2,4)\}]} - \frac{3}{12} \times 4 \times w_{[\{(1,1)(1,2)(3,4)\}]} \\
& - \frac{3}{1} \times 1 \times w_{[\{(1,1)(2,2)(3,3)\}]} - \frac{3}{6} \times 2 \times w_{[\{(1,1)(2,3)(2,3)\}]} \\
& - \frac{3}{12} \times 4 \times w_{[\{(1,1)(1,2)(3,3)\}]} - \frac{3}{3} \times 2 \times w_{[\{(1,1)(1,1)(2,3)\}]} \\
& - \frac{3}{12} \times 4 \times w_{[\{(1,1)(1,2)(1,3)\}]} - \frac{3}{6} \times 4 \times w_{[\{(1,1)(1,2)(2,2)\}]}
\end{aligned}$$

$$\begin{aligned}
& -\frac{3}{3} \times 3 \times w_{[\{(1,1)(1,1)(2,2)\}]} - \frac{3}{12} \times 4 \times w_{[\{(1,1)(1,2)(1,2)\}]} \\
& -\frac{3}{6} \times 4 \times w_{[\{(1,1)(1,1)(1,2)\}]} - \frac{3}{1} \times 1 \times w_{[\{(1,1)(1,1)(1,1)\}]}
\end{aligned} \tag{94}$$

$$\begin{aligned}
w_{[\{(1,2)(1,3)(4,5)\}]}^* &= 12 \times \sum_{i,j,k,l,m} w(i,j)w(i,k)w(l,m) \\
&= 12 \times \left( \sum_i \left( \sum_j w(i,j) \right)^2 \right) \left( \sum_{l,m} w(l,m) \right)
\end{aligned} \tag{95}$$

$$\begin{aligned}
w_{[\{(1,2)(1,3)(4,5)\}]} &= w_{[\{(1,2)(1,3)(4,5)\}]}^* - \frac{12}{12} \times 1 \times w_{[\{(1,1)(2,3)(2,4)\}]} \\
& - \frac{12}{6} \times 1 \times w_{[\{(1,2)(1,2)(3,4)\}]} - \frac{12}{24} \times 4 \times w_{[\{(1,2)(1,3)(2,4)\}]} \\
& - \frac{12}{8} \times 2 \times w_{[\{(1,2)(1,3)(1,4)\}]} - \frac{12}{12} \times 2 \times w_{[\{(1,1)(1,2)(3,4)\}]} \\
& - \frac{12}{6} \times 1 \times w_{[\{(1,1)(2,3)(2,3)\}]} - \frac{12}{8} \times 2 \times w_{[\{(1,2)(1,3)(2,3)\}]} \\
& - \frac{12}{12} \times 2 \times w_{[\{(1,1)(1,2)(3,3)\}]} - \frac{12}{24} \times 4 \times w_{[\{(1,2)(1,2)(1,3)\}]} \\
& - \frac{12}{24} \times 6 \times w_{[\{(1,1)(1,2)(2,3)\}]} - \frac{12}{3} \times 1 \times w_{[\{(1,1)(1,1)(2,3)\}]} \\
& - \frac{12}{12} \times 5 \times w_{[\{(1,1)(1,2)(1,3)\}]} - \frac{12}{6} \times 2 \times w_{[\{(1,1)(1,2)(2,2)\}]} \\
& - \frac{12}{4} \times 2 \times w_{[\{(1,2)(1,2)(1,2)\}]} - \frac{12}{3} \times 1 \times w_{[\{(1,1)(1,1)(2,2)\}]} \\
& - \frac{12}{12} \times 5 \times w_{[\{(1,1)(1,2)(1,2)\}]} - \frac{12}{6} \times 4 \times w_{[\{(1,1)(1,1)(1,2)\}]} \\
& - \frac{12}{1} \times 1 \times w_{[\{(1,1)(1,1)(1,1)\}]}
\end{aligned} \tag{96}$$

$$\begin{aligned}
w_{[\{(1,2)(3,4)(5,6)\}]} &= w_{[\{(1,2)(3,4)(5,6)\}]}^* - w_{[\{(1,1)(1,1)(1,1)\}]} - w_{[\{(1,1)(1,1)(1,2)\}]} \\
& - w_{[\{(1,1)(1,1)(2,2)\}]} - w_{[\{(1,1)(1,2)(1,2)\}]} - w_{[\{(1,1)(1,2)(2,2)\}]} \\
& - w_{[\{(1,2)(1,2)(1,2)\}]} - w_{[\{(1,1)(1,1)(2,3)\}]} - w_{[\{(1,1)(1,2)(1,3)\}]} \\
& - w_{[\{(1,1)(1,2)(3,3)\}]} - w_{[\{(1,2)(1,2)(1,3)\}]} - w_{[\{(1,1)(1,2)(2,3)\}]} \\
& - w_{[\{(1,1)(2,2)(3,3)\}]} - w_{[\{(1,1)(2,3)(2,3)\}]} - w_{[\{(1,2)(1,3)(2,3)\}]} \\
& - w_{[\{(1,2)(1,3)(1,4)\}]} - w_{[\{(1,1)(1,2)(3,4)\}]} - w_{[\{(1,1)(2,2)(3,4)\}]} \\
& - w_{[\{(1,1)(2,3)(2,4)\}]} - w_{[\{(1,2)(1,2)(3,4)\}]} - w_{[\{(1,2)(1,3)(2,4)\}]} \\
& - w_{[\{(1,1)(2,3)(4,5)\}]} - w_{[\{(1,2)(1,3)(4,5)\}]}
\end{aligned} \tag{97}$$

$$\tag{98}$$

$$E(T^3) = \frac{h_{[\{(1,1)(1,1)(1,1)\}]} }{\#([\{(1,1)(1,1)(1,1)\}])} w_{[\{(1,1)(1,1)(1,1)\}]}$$

$$\begin{aligned}
& + \frac{h_{[\{(1,1)(1,1)(1,2)\}]} }{\#([\{(1,1)(1,1)(1,2)\}])} w_{[\{(1,1)(1,1)(1,2)\}]} + \frac{h_{[\{(1,1)(1,1)(2,2)\}]} }{\#([\{(1,1)(1,1)(2,2)\}])} w_{[\{(1,1)(1,1)(2,2)\}]} \\
& + \frac{h_{[\{(1,1)(1,2)(1,2)\}]} }{\#([\{(1,1)(1,2)(1,2)\}])} w_{[\{(1,1)(1,2)(1,2)\}]} + \frac{h_{[\{(1,1)(1,2)(2,2)\}]} }{\#([\{(1,1)(1,2)(2,2)\}])} w_{[\{(1,1)(1,2)(2,2)\}]} \\
& + \frac{h_{[\{(1,2)(1,2)(1,2)\}]} }{\#([\{(1,2)(1,2)(1,2)\}])} w_{[\{(1,2)(1,2)(1,2)\}]} + \frac{h_{[\{(1,1)(1,1)(2,3)\}]} }{\#([\{(1,1)(1,1)(2,3)\}])} w_{[\{(1,1)(1,1)(2,3)\}]}
\end{aligned}$$

$$\begin{aligned}
& + \frac{h_{\{(1,1)(1,2)(1,3)\}}}{\#(\{(1,1)(1,2)(1,3)\})} w_{\{(1,1)(1,2)(1,3)\}} + \frac{h_{\{(1,1)(1,2)(3,3)\}}}{\#(\{(1,1)(1,2)(3,3)\})} w_{\{(1,1)(1,2)(3,3)\}} \\
& + \frac{h_{\{(1,2)(1,2)(1,3)\}}}{\#(\{(1,2)(1,2)(1,3)\})} w_{\{(1,2)(1,2)(1,3)\}} + \frac{h_{\{(1,1)(1,2)(2,3)\}}}{\#(\{(1,1)(1,2)(2,3)\})} w_{\{(1,1)(1,2)(2,3)\}} \\
& + \frac{h_{\{(1,1)(2,2)(3,3)\}}}{\#(\{(1,1)(2,2)(3,3)\})} w_{\{(1,1)(2,2)(3,3)\}} + \frac{h_{\{(1,1)(2,3)(2,3)\}}}{\#(\{(1,1)(2,3)(2,3)\})} w_{\{(1,1)(2,3)(2,3)\}} \\
& + \frac{h_{\{(1,2)(1,3)(2,3)\}}}{\#(\{(1,2)(1,3)(2,3)\})} w_{\{(1,2)(1,3)(2,3)\}} + \frac{h_{\{(1,2)(1,3)(1,4)\}}}{\#(\{(1,2)(1,3)(1,4)\})} w_{\{(1,2)(1,3)(1,4)\}} \\
& + \frac{h_{\{(1,1)(1,2)(3,4)\}}}{\#(\{(1,1)(1,2)(3,4)\})} w_{\{(1,1)(1,2)(3,4)\}} + \frac{h_{\{(1,1)(2,2)(3,4)\}}}{\#(\{(1,1)(2,2)(3,4)\})} w_{\{(1,1)(2,2)(3,4)\}} \\
& + \frac{h_{\{(1,1)(2,3)(2,4)\}}}{\#(\{(1,1)(2,3)(2,4)\})} w_{\{(1,1)(2,3)(2,4)\}} + \frac{h_{\{(1,2)(1,2)(3,4)\}}}{\#(\{(1,2)(1,2)(3,4)\})} w_{\{(1,2)(1,2)(3,4)\}} \\
& + \frac{h_{\{(1,2)(1,3)(2,4)\}}}{\#(\{(1,2)(1,3)(2,4)\})} w_{\{(1,2)(1,3)(2,4)\}} + \frac{h_{\{(1,1)(2,3)(4,5)\}}}{\#(\{(1,1)(2,3)(4,5)\})} w_{\{(1,1)(2,3)(4,5)\}} \\
& + \frac{h_{\{(1,2)(1,3)(4,5)\}}}{\#(\{(1,2)(1,3)(4,5)\})} w_{\{(1,2)(1,3)(4,5)\}} + \frac{h_{\{(1,2)(3,4)(5,6)\}}}{\#(\{(1,2)(3,4)(5,6)\})} w_{\{(1,2)(3,4)(5,6)\}} \\
& = \frac{h_{\{(1,1)(1,1)(1,1)\}}}{n} w_{\{(1,1)(1,1)(1,1)\}} + \frac{h_{\{(1,1)(1,1)(1,2)\}}}{6n(n_1)} w_{\{(1,1)(1,1)(1,2)\}} \\
& + \frac{h_{\{(1,1)(1,1)(2,2)\}}}{3n(n_1)} w_{\{(1,1)(1,1)(2,2)\}} + \frac{h_{\{(1,1)(1,2)(1,2)\}}}{12n(n_1)} w_{\{(1,1)(1,2)(1,2)\}} \\
& + \frac{h_{\{(1,1)(1,2)(2,2)\}}}{6n(n_1)} w_{\{(1,1)(1,2)(2,2)\}} + \frac{h_{\{(1,2)(1,2)(1,2)\}}}{4n(n_1)} w_{\{(1,2)(1,2)(1,2)\}} \\
& + \frac{h_{\{(1,1)(1,1)(2,3)\}}}{3n(n_1)(n-2)} w_{\{(1,1)(1,1)(2,3)\}} + \frac{h_{\{(1,1)(1,2)(1,3)\}}}{12n(n_1)(n-2)} w_{\{(1,1)(1,2)(1,3)\}} \\
& + \frac{h_{\{(1,1)(1,2)(3,3)\}}}{12n(n_1)(n-2)} w_{\{(1,1)(1,2)(3,3)\}} + \frac{h_{\{(1,2)(1,2)(1,3)\}}}{24n(n_1)(n-2)} w_{\{(1,2)(1,2)(1,3)\}} \\
& + \frac{h_{\{(1,1)(1,2)(2,3)\}}}{24n(n_1)(n-2)} w_{\{(1,1)(1,2)(2,3)\}} + \frac{h_{\{(1,1)(2,2)(3,3)\}}}{n(n_1)(n-2)} w_{\{(1,1)(2,2)(3,3)\}} \\
& + \frac{h_{\{(1,1)(2,3)(2,3)\}}}{6n(n_1)(n-2)} w_{\{(1,1)(2,3)(2,3)\}} + \frac{h_{\{(1,2)(1,3)(2,3)\}}}{8n(n_1)(n-2)} w_{\{(1,2)(1,3)(2,3)\}} \\
& + \frac{h_{\{(1,2)(1,3)(1,4)\}}}{8n(n_1)(n-2)(n-3)} w_{\{(1,2)(1,3)(1,4)\}} + \frac{h_{\{(1,1)(1,2)(3,4)\}}}{12n(n_1)(n-2)(n-3)} w_{\{(1,1)(1,2)(3,4)\}} \\
& + \frac{h_{\{(1,1)(2,2)(3,4)\}}}{3n(n_1)(n-2)(n-3)} w_{\{(1,1)(2,2)(3,4)\}} + \frac{h_{\{(1,1)(2,3)(2,4)\}}}{12n(n_1)(n-2)(n-3)} w_{\{(1,1)(2,3)(2,4)\}} \\
& + \frac{h_{\{(1,2)(1,2)(3,4)\}}}{6n(n_1)(n-2)(n-3)} w_{\{(1,2)(1,2)(3,4)\}} + \frac{h_{\{(1,2)(1,3)(2,4)\}}}{24n(n_1)(n-2)(n-3)} w_{\{(1,2)(1,3)(2,4)\}} \\
& + \frac{h_{\{(1,1)(2,3)(4,5)\}}}{3n(n_1)(n-2)(n-3)(n-4)} w_{\{(1,1)(2,3)(4,5)\}} + \frac{h_{\{(1,2)(1,3)(4,5)\}}}{12n(n_1)(n-2)(n-3)(n-4)} w_{\{(1,2)(1,3)(4,5)\}} \\
& + \frac{h_{\{(1,2)(3,4)(5,6)\}}}{n(n_1)(n-2)(n-3)(n-4)(n-5)} w_{\{(1,2)(3,4)(5,6)\}}
\end{aligned} \tag{99}$$
